# Supplementary material for: Heterologous Synthesis of Monacolin J by Reconstructing Its Biosynthetic Gene Cluster in Aspergillus niger
Source: MDPI journal article supplement (doi:10.3390/jof8040407), 2022-04-16
Supplement: s1 [file s1]

# Supporting Information

## **Heterologous synthesis of Monacolin J by reconstructing its biosynthetic gene cluster in *Aspergillus niger***

**Xu Zeng<sup>1</sup>, Junwei Zheng<sup>1</sup>, Feifei Lu<sup>1</sup>, Li Pan<sup>1 2\*</sup>, Bin Wang<sup>1 2\*</sup>**

1 School of Biology and Biological Engineering, South China University of Technology, Guangzhou Higher Education Mega Center, Panyu town Guangzhou 510006, China,

2 Guangdong Provincial Key Laboratory of Fermentation and Enzyme Engineering, Guangzhou 510006, China

\* Correspondence: btbinwang@scut.edu.cn (B.W) btlippan@scut.edu.cn (L.P)

**Supplemental Table S1.** The plasmid construction strategy used in this study

| Fragments assembled by overlapping PCR<br>(Corresponding primers)                              |                                    |                                                                                                                                               | Generated plasmid<br>via in-fusion cloning                                                                            |
|------------------------------------------------------------------------------------------------|------------------------------------|-----------------------------------------------------------------------------------------------------------------------------------------------|-----------------------------------------------------------------------------------------------------------------------|
| Fragment A                                                                                     | Fragment B                         | Fragment C                                                                                                                                    |                                                                                                                       |
| *Up <sub>pyrG</sub> -P <sub>gpdA</sub><br>(Up <sub>pyrG</sub> -F/R,<br>P <sub>gpdA</sub> -F/R) | <i>lovC</i><br>( <i>lovC</i> -F/R) | T <sub>tef</sub> -*Dn <sub>pyrG</sub><br>(T <sub>tef</sub> -1-F/R,<br>Dn <sub>pyrG</sub> -F/R)                                                | pM18T-Up <sub>pyrG</sub> -P <sub>gpdA</sub> -<br><i>lovC</i> -T <sub>tef</sub> -Dn <sub>pyrG</sub>                    |
| Up <sub>aamA</sub> -P <sub>tef</sub><br>(Up <sub>aamA</sub> -F/R,<br>P <sub>tef</sub> -1-F/R)  | <i>lovG</i><br>( <i>lovG</i> -F/R) | T <sub>tef</sub> -pyrG <sub>An</sub> -Dn <sub>aamA</sub><br>(T <sub>tef</sub> -2-F/R,<br>pyrG <sub>An</sub> -F/R,<br>Dn <sub>aamA</sub> -F/R) | pM18T-Up <sub>aamA</sub> -P <sub>tef</sub> -<br><i>lovG</i> -T <sub>tef</sub> -pyrG <sub>An</sub> -Dn <sub>aamA</sub> |
| Up <sub>amyA</sub> -P <sub>tef</sub><br>(Up <sub>amyA</sub> -F/R,<br>P <sub>tef</sub> -2-F/R)  | <i>lovA</i><br>( <i>lovA</i> -F/R) | T <sub>tef</sub> -Dn <sub>amyA</sub><br>(T <sub>tef</sub> -3-F/R,<br>Dn <sub>amyA</sub> -F/R)                                                 | pM18T-Up <sub>amyA</sub> -P <sub>tef</sub> -<br><i>lovA</i> -T <sub>tef</sub> -Dn <sub>amyA</sub>                     |

\*Up<sub>geneA</sub>: represents the upstream region of gene A.

Dn<sub>geneA</sub>: represents the downstream region of gene A.

**Supplemental Table S2.** Construction and identification primers used in this study

| Primer                      | Sequences                                                                                | Function description                                                 |
|-----------------------------|------------------------------------------------------------------------------------------|----------------------------------------------------------------------|
| <i>lovB</i> -up-F           | ACTGAGAGCCTGAGCTTCATCCCCAGCATC<br>ATTACACCTCAGCATCTAGAATGGCTCAAT<br>CTATGTATCCTAATG      | Amplification of the upstream fragment of <i>lovB</i> ORF            |
| <i>lovB</i> -up-R           | GCCGGTCCCTGCTCCAATCTCCAGAATAT<br>CCATTGACTGATAGCGATGGGCGATCTGC<br>GCCACCAATTCCCGGGCGTAGT | Amplification of the upstream fragment of <i>lovB</i> ORF            |
| <i>lovB</i> -dn-F           | ACTACGCCCCGGAATTGGTGGCGCAGATC<br>GCCCATCGCTATCAGTCAATGGATATTCTG<br>GAGATTGGAGCAG         | Amplification of the downstream fragment of <i>lovB</i> ORF          |
| <i>lovB</i> -dn-R           | TCGTAAAGGCTTTTTTAAGGAAGTCATAA<br>CGGCATAAATCGAATGTCCGCTCATGCCA<br>GCTTCAGGGCGG           | Amplification of the downstream fragment of <i>lovB</i> ORF          |
| <i>Up<sub>pyrG</sub></i> -F | <u>ACCCGGGGATCCTCTAGAG</u> ACTGGTGGC<br>AGGCGTCAAGT                                      | Amplification of the upstream fragment of <i>pyrG<sub>An</sub></i>   |
| <i>Up<sub>pyrG</sub></i> -R | <u>CTCTTGGGTCTCTCCCGTC</u> AGATGTTAAA<br>GGGTTGGGATGG                                    | Amplification of the upstream fragment of <i>pyrG<sub>An</sub></i>   |
| <i>P<sub>gpdA</sub></i> -F  | <u>CATCCCAACCCTTTAACATCT</u> GACGGGAG<br>AGACCCAAGAG                                     | Amplification of the fragment <i>P<sub>gpdA</sub></i>                |
| <i>P<sub>gpdA</sub></i> -R  | <u>ATGAATGGCTGGTCGCCCATTG</u> TTTAGATG<br>TGTCTATGTGGCG                                  | Amplification of the fragment <i>P<sub>gpdA</sub></i>                |
| <i>lovC</i> -F              | <u>CACATAGACACATCTAAACA</u> ATGGG<br>CGACCAGCCATTCATT                                    | Amplification of the whole <i>lovC</i> ORF                           |
| <i>lovC</i> -R              | <u>TAGCGAAATGGATTGATTG</u> TTTACGG<br>CCCCTCGAGCCGA                                      | Amplification of the whole <i>lovC</i> ORF                           |
| <i>T<sub>tef</sub></i> -1-F | <u>TTCGGCTCGAGGGGCCGTAAG</u> CGGACATT<br>CGATTATGCCGT                                    | Amplification of the fragment <i>T<sub>tef</sub></i>                 |
| <i>T<sub>tef</sub></i> -1-R | <u>GACGTTGGTTTTCTTCTCCT</u> GTATTGGGAT<br>GAATTTTGTATGCAC                                | Amplification of the fragment <i>T<sub>tef</sub></i>                 |
| <i>Dn<sub>pyrG</sub></i> -F | <u>TACAAAATTCATCCCAATAC</u> AGGAGAAG<br>AAAACCAACGTCAC                                   | Amplification of the downstream fragment of <i>pyrG<sub>An</sub></i> |
| <i>Dn<sub>pyrG</sub></i> -R | <u>CTTGCATGCCTGCAGGTCGAC</u> GATAACTC<br>AACCGAGCGTGCCGT                                 | Amplification of the downstream fragment of <i>pyrG<sub>An</sub></i> |
| <i>Up<sub>aamA</sub></i> -F | <u>ACCCGGGGATCCTCTAGAG</u> AGCGTT<br>GTTTCTTACCCCC                                       | Amplification of the upstream fragment of <i>Up<sub>aamA</sub></i>   |
| <i>Up<sub>aamA</sub></i> -R | <u>GCGGTGATTCTGCTGTCTC</u> GGAATTG<br>TCCGTCCTACCGAA                                     | Amplification of the upstream fragment of <i>Up<sub>aamA</sub></i>   |

|                             |                                                         |                                                                    |
|-----------------------------|---------------------------------------------------------|--------------------------------------------------------------------|
| <i>P<sub>tef</sub></i> -1-F | <u>TTCGGTAGGACGGACAATTCCGAGA</u><br>CAGCAGAATCACCGC     | Amplification of the fragment <i>P<sub>tef</sub></i>               |
| <i>P<sub>tef</sub></i> -1-R | <u>GGAGATGCTTGGTAACGCATGTGAA</u><br>GGTTGTGTTATGTTTTGTG | Amplification of the fragment <i>P<sub>tef</sub></i>               |
| <i>lovG</i> -F              | <u>AAACATAACACAACCTTCACATGCG</u><br>TTACCAAGCATCTCCA    | Amplification of the whole <i>lovG</i> ORF                         |
| <i>lovG</i> -R              | <u>GGCATAAATCGAATGTCCGCCTACTC</u><br>CAATGTCTGGGCCG     | Amplification of the whole <i>lovG</i> ORF                         |
| <i>T<sub>tef</sub></i> -2-F | <u>CGGCCCAGACATTGGAGTAGGCGGA</u><br>CATTGATTTATGCCGTT   | Amplification of the fragment <i>T<sub>tef</sub></i>               |
| <i>T<sub>tef</sub></i> -2-R | <u>CGCGTTCTCGAGGAAGTTGCGTATT</u><br>GGGATGAATTTTGTATGCA | Amplification of the fragment <i>T<sub>tef</sub></i>               |
| <i>pyrG<sub>An</sub></i> -F | <u>TACAAAATTCATCCCAATACGCAACT</u><br>TCCTCGAGAACGCG     | Amplification of the fragment <i>pyrG<sub>An</sub></i>             |
| <i>pyrG<sub>An</sub></i> -R | <u>CCAACGTACTTGGTCACCCGCCCTTT</u><br>TAGTCAATACCGTTAC   | Amplification of the fragment <i>pyrG<sub>An</sub></i>             |
| <i>D<sub>naamA</sub></i> -F | <u>AACGGTATTGACTAAAAGGGCGGGT</u><br>GACCAAGTACGTTG      | Amplification of the downstream fragment of <i>aamA</i>            |
| <i>D<sub>naamA</sub></i> -R | <u>ATGCCTGCAGGTCGACGATAGCCCT</u><br>GGTACAGTTAGCG       | Amplification of the downstream fragment of <i>aamA</i>            |
| <i>Up<sub>amyA</sub></i> -F | <u>ACCCGGGGGATCCTCTAGAGAGCAAT</u><br>CCATTTATTTCTTCTC   | Amplification of the upstream fragment of <i>Up<sub>amyA</sub></i> |
| <i>Up<sub>amyA</sub></i> -R | <u>GCGGTGATTCTGCTGTCTCGGAGCG</u><br>CCTTCAAGTCATCT      | Amplification of the upstream fragment of <i>Up<sub>amyA</sub></i> |
| <i>P<sub>tef</sub></i> -2-F | <u>CAGATGACTTGAAGGCGCTCCGAGA</u><br>CAGCAGAATCACCGC     | Amplification of the fragment <i>P<sub>tef</sub></i>               |
| <i>P<sub>tef</sub></i> -2-R | <u>TGAGCGCGTCGACAGTCATGGTGAA</u><br>GGTTGTGTTATGTTTTGTG | Amplification of the fragment <i>P<sub>tef</sub></i>               |
| <i>lovA</i> -F              | <u>AACATAACACAACCTTCACCATGAC</u><br>TGTCGACGCGCTCACA    | Amplification of the whole <i>lovA</i> ORF                         |
| <i>lovA</i> -R              | <u>GGCATAAATCGAATGTCCGCCTATAG</u><br>TGAACCAGGAAGGCGG   | Amplification of the whole <i>lovA</i> ORF                         |
| <i>T<sub>tef</sub></i> -3-F | <u>GCCTTCCTGGTTCACTATAGGCGGAC</u><br>ATTCGATTTATGCCGTT  | Amplification of the fragment <i>T<sub>tef</sub></i>               |
| <i>T<sub>tef</sub></i> -3-R | <u>CGACCATAAGATACATCCCCGTATTG</u><br>GGATGAATTTTGTATGCA | Amplification of the fragment <i>T<sub>tef</sub></i>               |
| <i>D<sub>namyA</sub></i> -F | <u>TACAAAATTCATCCCAATACGGGGAT</u><br>GTATCTTATGGTTCG    | Amplification of the downstream fragment of <i>amyA</i>            |
| <i>D<sub>namyA</sub></i> -R | <u>ATGCCTGCAGGTCGACGATACGGAT</u>                        | Amplification of the                                               |

|                     |                          |                                                                  |
|---------------------|--------------------------|------------------------------------------------------------------|
|                     | CACCGTCGAGCAC            | downstream fragment of<br><i>amyA</i>                            |
| <i>LovB</i> -YZ1-F  | CGTACCTGGCGACCTATGACTA   | Yeast transformation<br>verification primers                     |
| <i>LovB</i> -YZ1-R  | GTAGGTAGCCTTGATGAGTGCC   | Yeast transformation<br>verification primers                     |
| <i>LovB</i> -YZ2-F  | AGGGAGACTACTTGAGCGGTGA   | Yeast transformation<br>verification primers                     |
| <i>LovB</i> -YZ2-R  | TGAACACTCTCAGGCACAAACC   | Yeast transformation<br>verification primers                     |
| <i>LovB</i> -YZ3-F  | ACTGTCTCTCGGGCAAGAATAC   | Yeast transformation<br>verification primers                     |
| <i>LovB</i> -YZ3-R  | TCAACTCTCCCCTCTGTGCTAA   | Yeast transformation<br>verification primers                     |
| <i>LovB</i> -JD-1-F | GAGGATTGCCTGAACATTGACA   | Location of <i>lovB</i> in the <i>glaA</i><br>(An03g06550) locus |
| <i>LovB</i> -JD-1-R | ACTCACGCCTCTGGCATAGC     | Location of <i>lovB</i> in the <i>glaA</i><br>(An03g06550) locus |
| <i>LovB</i> -JD-2-F | TAACATCTAAACTCTTCTCCATCG | Location of <i>lovB</i> in the <i>glaA</i><br>(An03g06550) locus |
| <i>LovB</i> -JD-2-R | ACGGTCTGGTTCTGTAGTCC     | Location of <i>lovB</i> in the <i>glaA</i><br>(An03g06550) locus |
| <i>LovC</i> -JD-1-F | CGGAAAGTGGAACGATTGGGGG   | Location of <i>lovC</i> in the<br><i>pyrG<sub>An</sub></i> locus |
| <i>LovC</i> -JD-1-R | TGGCAAAGGCAGCCCAAGCAAC   | Location of <i>lovC</i> in the<br><i>pyrG<sub>An</sub></i> locus |
| <i>LovC</i> -JD-2-F | GCAGTGAGGAAGAGCGGCAG     | Location of <i>lovC</i> in the<br><i>pyrG<sub>An</sub></i> locus |
| <i>LovC</i> -JD-2-R | ATTGTCGATCTGCCCACTTTCT   | Location of <i>lovC</i> in the<br><i>pyrG<sub>An</sub></i> locus |
| <i>LovG</i> -JD-1-F | CGTCCTTCGGTCGGAATGATG    | Location of <i>lovG</i> in the<br><i>aamA</i> (An11g03340) locus |
| <i>LovG</i> -JD-1-R | CGCTCACGGAGGGTCCATTAT    | Location of <i>lovG</i> in the<br><i>aamA</i> (An11g03340) locus |
| <i>LovG</i> -JD-2-F | GGAACGAAGTGATGAAGAACCA   | Location of <i>lovG</i> in the<br><i>aamA</i> (An11g03340) locus |
| <i>LovG</i> -JD-2-R | CATACGAGGCGAAACGGGGA     | Location of <i>LovG</i> in the<br><i>aamA</i> (An11g03340) locus |
| <i>LovA</i> -JD-1-F | ATATCAGGCCGCGCACGAAAG    | Location of <i>lovA</i> in the<br><i>amyA</i> (An05g02100) locus |
| <i>LovA</i> -JD-1-R | CCTCATGGTCGTCAGTTCCC     | Location of <i>lovA</i> in the<br><i>amyA</i> (An05g02100) locus |
| <i>LovA</i> -JD-2-F | TTCGGTTGGCATCCACGGGC     | Location of <i>lovA</i> in the<br><i>amyA</i> (An05g02100) locus |

|                     |                         |                                                                               |
|---------------------|-------------------------|-------------------------------------------------------------------------------|
| <i>LovA</i> -JD-2-R | TTAACAGTTTGC GGGAGATGCA | Location of <i>lovA</i> in the <i>amyA</i> (An05g02100) locus                 |
| RT- <i>lovB</i> -F  | GCGTCCAACCGCATCTCG      | Semi-quantitative primers for <i>lovB</i> gene                                |
| RT- <i>lovB</i> -R  | AGATTTCGCACCCGCAGCAA    | Semi-quantitative primers for <i>lovB</i> gene                                |
| RT- <i>lovC</i> -F  | ACCGCTGGATTGGCGATGA     | Semi-quantitative primers for <i>lovC</i> gene                                |
| RT- <i>lovC</i> -R  | CGATAGTCAAAGACCTCCTC    | Semi-quantitative primers for <i>lovC</i> gene                                |
| RT- <i>lovG</i> -F  | CGACAACAATCATAATGGACCC  | Semi-quantitative primers for <i>lovG</i> gene                                |
| RT- <i>lovG</i> -R  | CTTGCCTCGTCTTGATACCAG   | Semi-quantitative primers for <i>lovG</i> gene                                |
| RT- <i>lovA</i> -F  | CTGGTTCTCGCAAAATGATAAG  | Semi-quantitative primers for <i>lovA</i> gene                                |
| RT- <i>lovA</i> -R  | GTGACTTCCTTGAATCCATCG   | Semi-quantitative primers for <i>lovA</i> gene                                |
| RT- <i>gpdA</i> -F  | CTCTGCTCCTTCCGCTGAT     | Semi-quantitative primers of internal reference gene <i>gpdA</i> (An16g01830) |
| RT- <i>gpdA</i> -R  | ACCCTCAACGATGCCGAAC     | Semi-quantitative primers of internal reference gene <i>gpdA</i> (An16g01830) |

**Supplemental Table S3.** CRISPR/Cas9 plasmids used in this study

| Plasmids                                       | Description/derivation                                                                                                                           | Reference |
|------------------------------------------------|--------------------------------------------------------------------------------------------------------------------------------------------------|-----------|
| PFC332- <i>pyrG<sub>An</sub></i> - <i>hygB</i> | PFC332 derivate with gRNA scaffold of <i>pyrG<sub>An</sub></i> under the control of promoter of <i>A. oryzae</i> U6 and <i>A. fumigatus</i> U6-2 | This work |
| PFC332- <i>aamA</i> - <i>hygB</i>              | PFC332 derivate with gRNA scaffold of <i>aamA</i> under the control of promoter of <i>A. oryzae</i> U6 and <i>A. fumigatus</i> U6-2              | This work |

|                                           |                                                                                                                                                           |           |
|-------------------------------------------|-----------------------------------------------------------------------------------------------------------------------------------------------------------|-----------|
| PFC332- <i>aamA</i> -<br><i>amyA-hygB</i> | PFC332 derivate with gRNA scaffold of <i>aamA</i> and<br><i>amyA</i> under the control of promoter of <i>A. oryzae</i> U6<br>and <i>A. fumigatus</i> U6-2 | This work |
|-------------------------------------------|-----------------------------------------------------------------------------------------------------------------------------------------------------------|-----------|

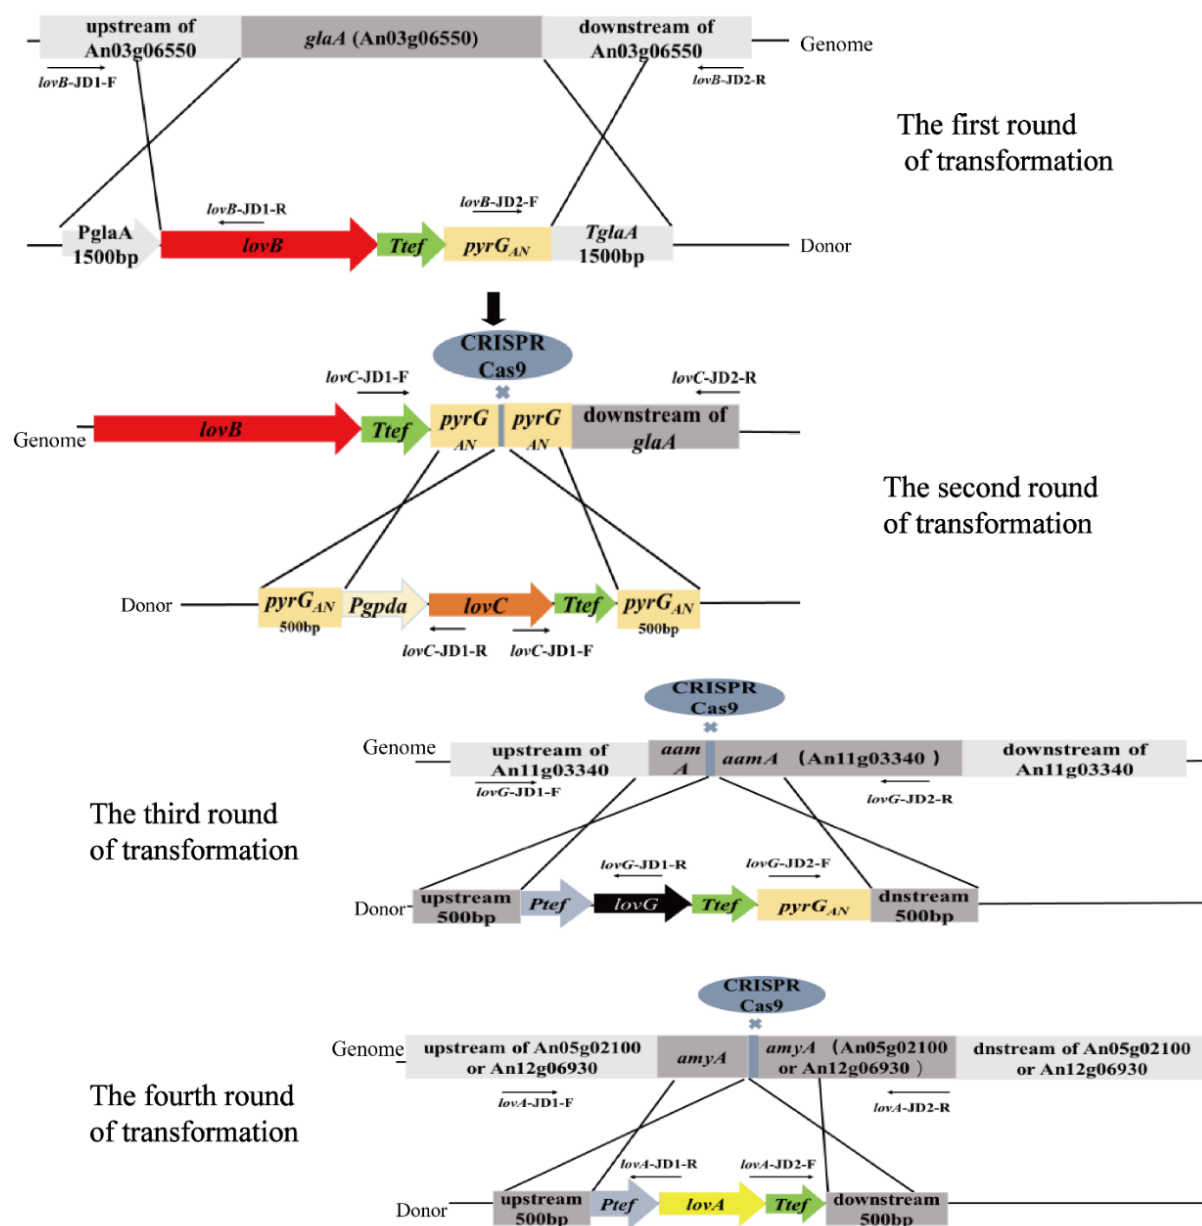

Figure S1. Schematic gene integration in *A. niger*.

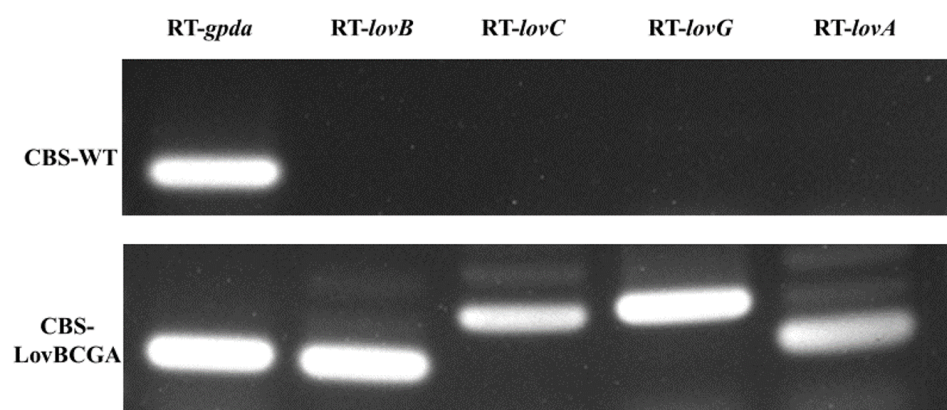

Figure S2. RT-PCR analysis of the expression of MJ genes in *A. niger* CBS-WT and CBS-LovBCGA strain. *gpda* was used as the internal reference gene.



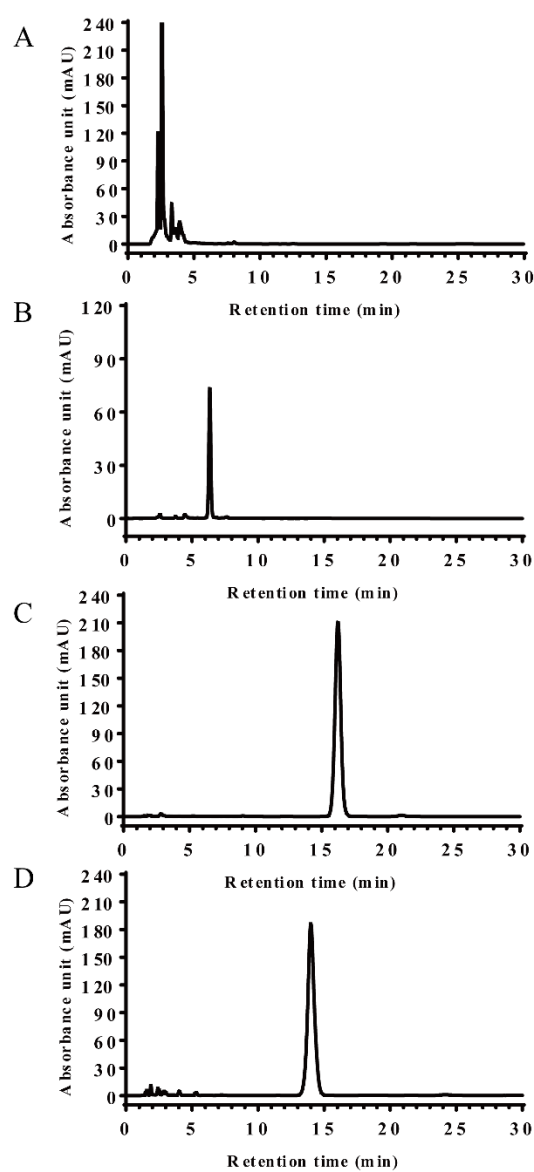

**Figure S3.** HPLC identification of *A. niger* strain fermentation product and standard products at 237 nm wavelength. (A) *A. niger* strain CBS513.88( $\Delta kusA$ ,  $\Delta pyrG$ ) (B) Monacolin J acid standard, retention time 6.473 min (C) Lovastatin lactone standard, retention time 16.238 min (D) Lovastatin acid standard, retention time 13.999 min.

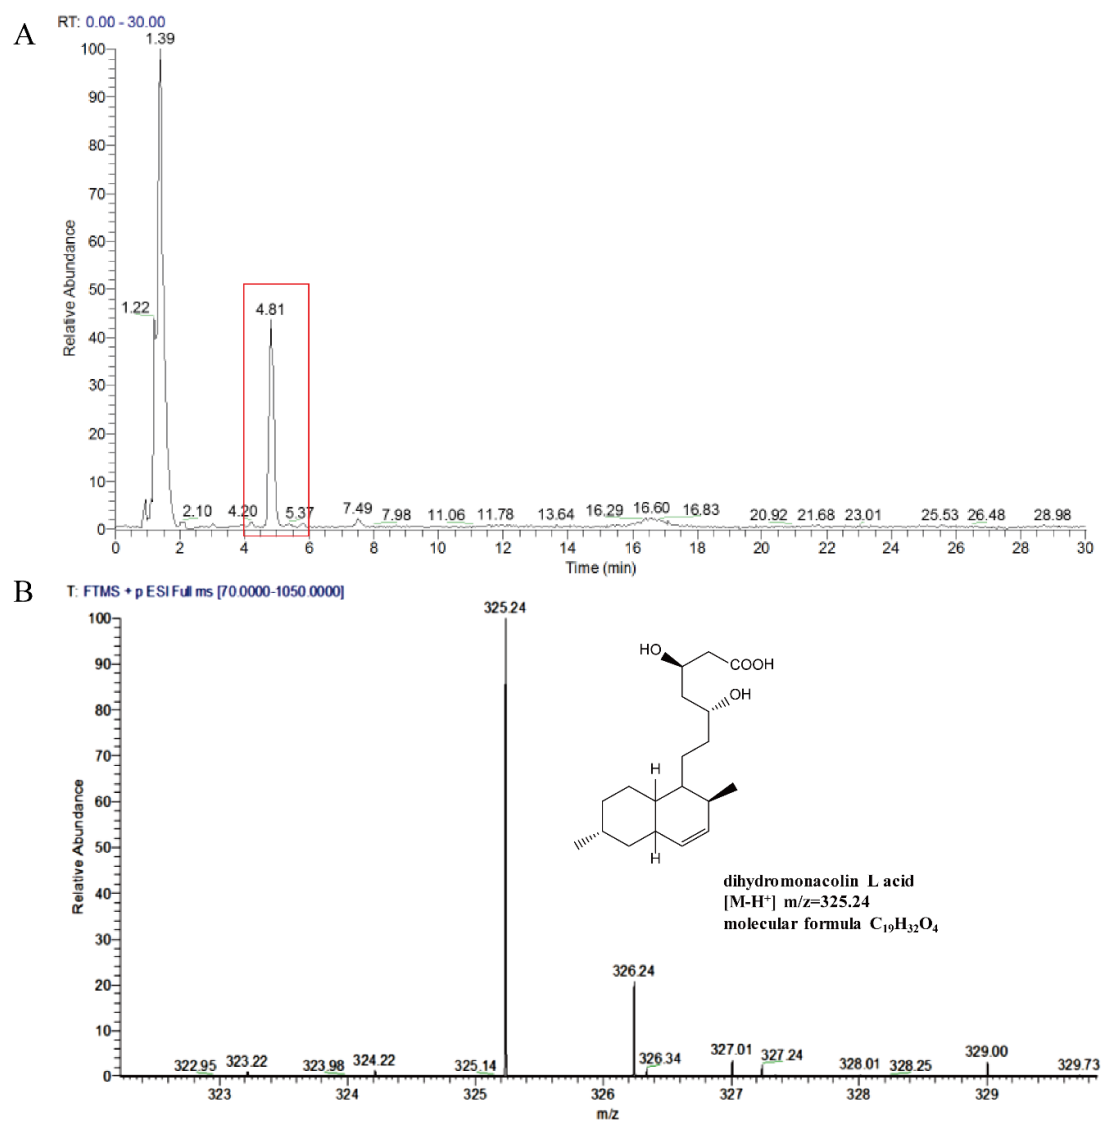

**Figure S4.** LC-MS identification DML acid of *A. niger* transformed strain CBS-LovBCG fermentation product (A) DML acid, retention time 4.81 min with the red square. (B) LC-MS identification of DML acid from *A. niger* strain CBS-LovBCG.

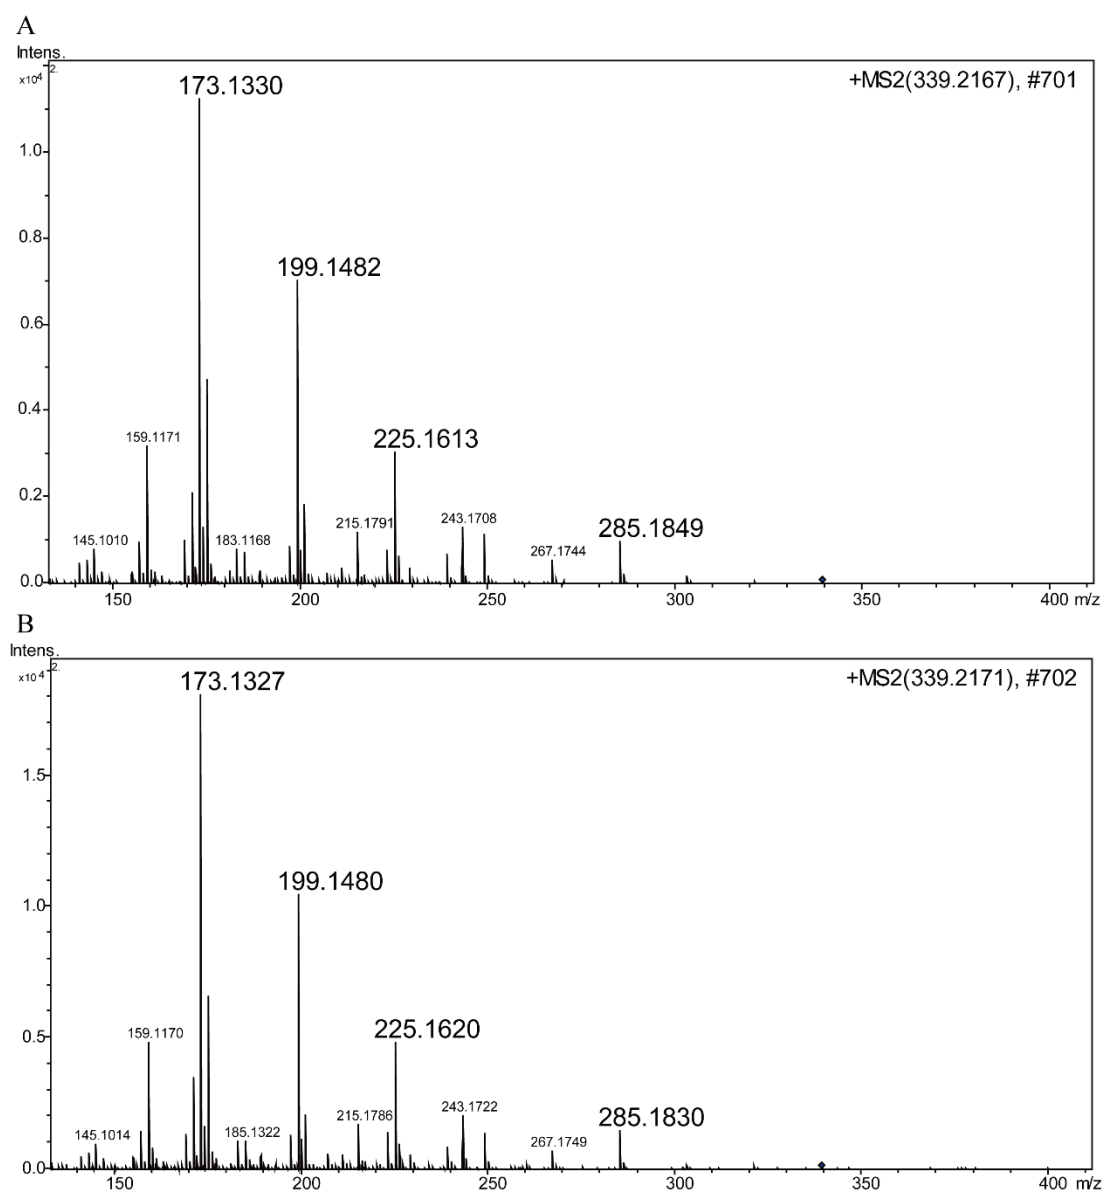

Figure S5. Tandem LC-MS/MS analysis of the mass spectra fragmentation of MJ standard (A) and MJ produced by *A. niger* strain CBS-LovBCGA (B).

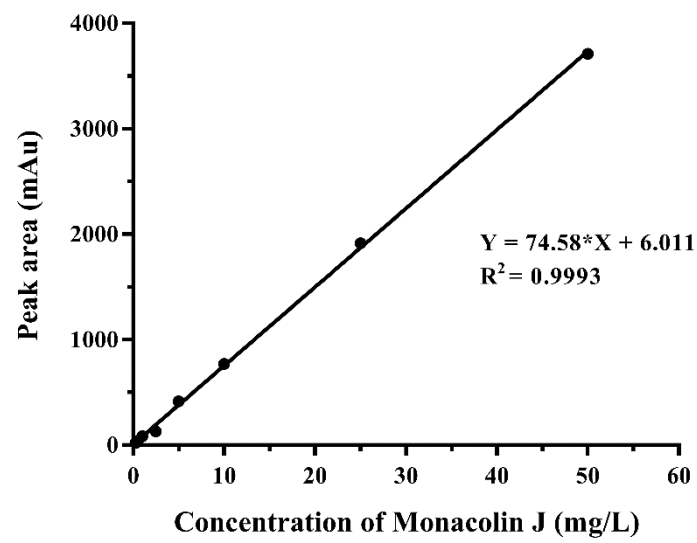

Figure S6. Calibration curves of Monacolin J developed by HPLC

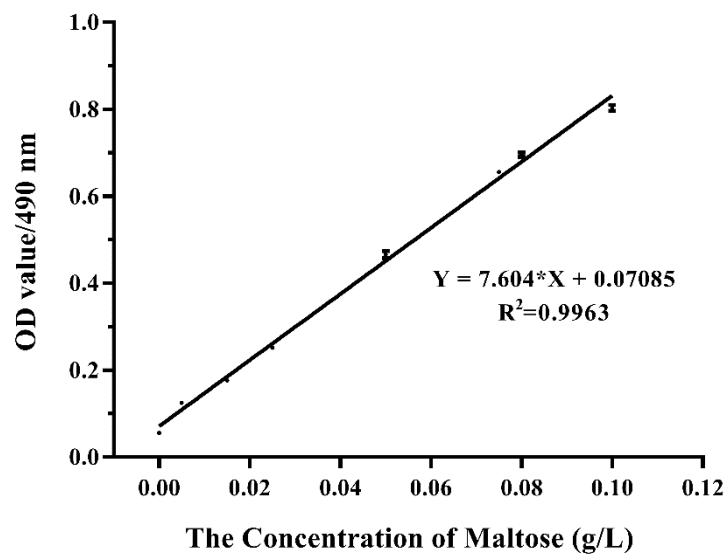

Figure S7. Calibration curves of the concentration of Maltose
